# Supplementary material for: Methanobrevibacter massiliense and Pyramidobacter piscolens Co-Culture Illustrates Transkingdom Symbiosis
Source: MDPI journal article supplement (doi:10.3390/microorganisms12010215), 2024-01-20
Supplement: s1 [file s1]

### Supplementary data S3

**Figure S3.1:** (a) Macroscopic observation of *M. massiliense*/*P. piscovens* Q8282 and Q8283 co-cultures, dark deposits are visible (b). Macroscopic observation of *P. piscovens* Q8451 and Q8452 cultures, dark deposits are not visible. (c) Macroscopic observation of negative controls (GG medium inoculated with DPBS 1× water).

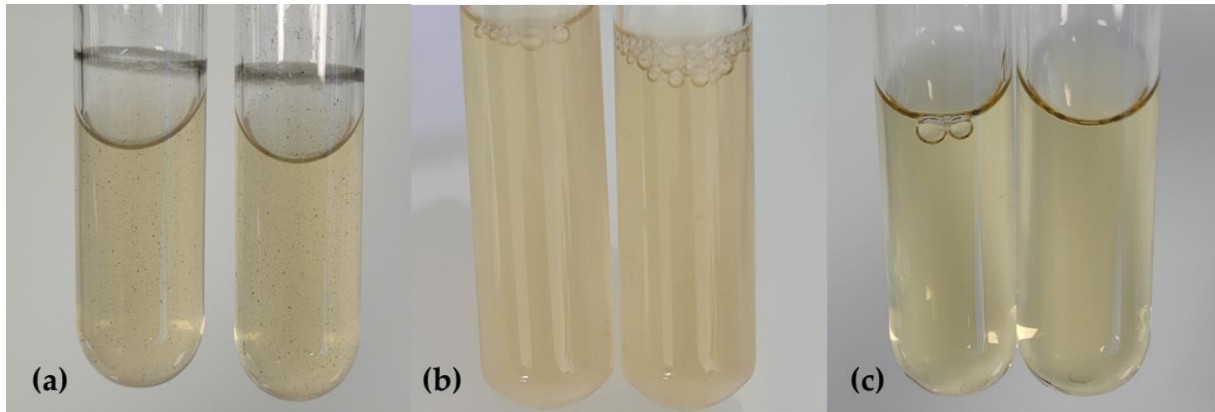

**Figure S3.2 :** Confocal microscopy of *M. massiliense*/ *P. pisciculus* Q8282 (**line 1**), of *P. pisciculus* cultured in liquid GG medium (**line 2**) and *P. pisciculus* cultured on COS medium (**line 3**): brightfill mode view (**column 1**): observation of diplo-coccobacilli, autofluorescence at 420 nm (**column 2**): autofluorescent coccobacilli are visible for co-culture but no autofluorescent coccobacilli are visible for *P. pisciculus* culture in GG medium or on COS medium, merged view of autofluorescence at 420 nm and brightfill mode (**column 3**): autofluorescent coccobacilli are visible as well as no autofluorescent coccobacilli for co-culture but no autofluorescent coccobacilli are visible for *P. pisciculus* culture in GG medium or on COS medium (LSM 900 (Carl Zeiss Microscopy GmbH)).

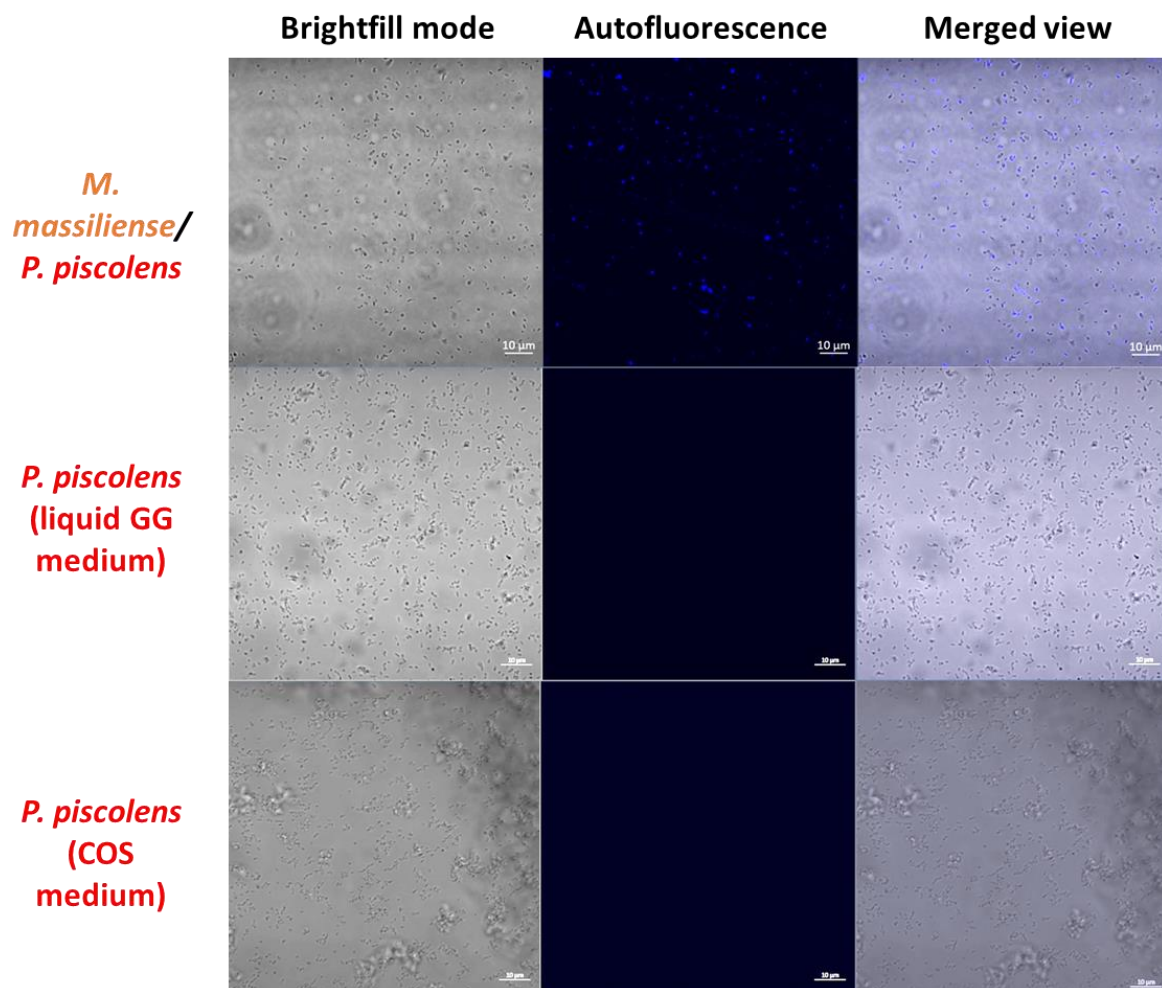

**Figure S3.3 :** Electron microscopy (TM4000 HITACHI, 10 KV, X 1.500). **(a)** Observation of *M. massiliense* and *P. piscicolens* co-culture, coccobacilli are visible, but no morphologic features allow distinction between *M. massiliense* and *P. piscicolens*. **(b)** and **(c)** Observation of deposits in *M. massiliense* and *P. piscicolens* co-culture. **(d)** Observation of *P. piscicolens* culture in GG medium. **(e)** Observation of *P. piscicolens* culture in COS medium

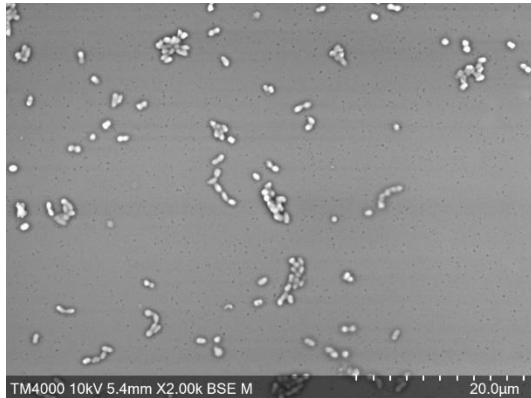

**(a)**

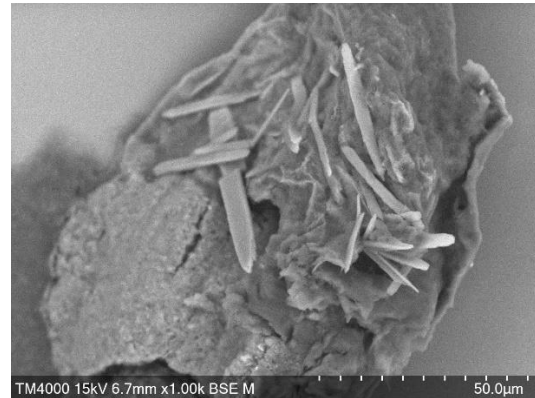

**(b)**

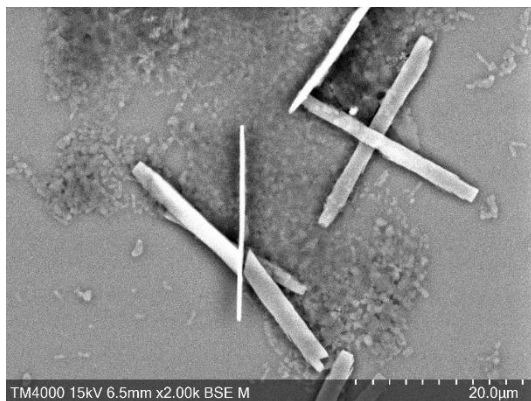

**(c)**

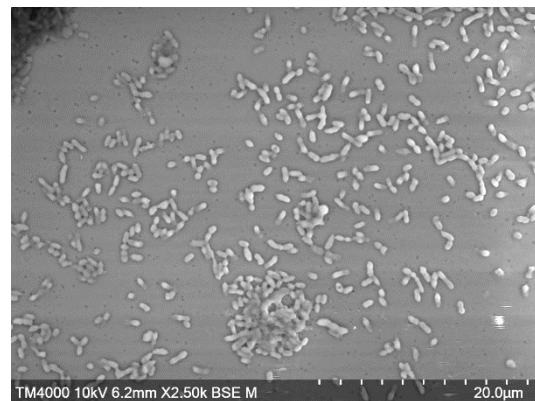

**(d)**

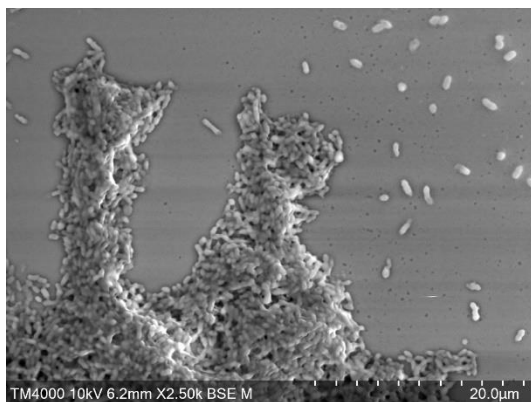

**(e)**
